# Supplementary material
Source: PubMed Central journal article supplement (PMC6456414)

## Supplementary Materials Table 1. Baseline Characteristics of Cohort by Initial CD4+ Recovery

| Characteristic                               | Low Recovery (n = 748) | High Recovery (n = 1136) |
|----------------------------------------------|------------------------|--------------------------|
| Age, years                                   | 37 (29, 44)            | 36 (29, 44)              |
| Age ≥45 years                                | 176 (23.5%)            | 255 (22.4%)              |
| Male                                         | 544 (72.7%)            | 843 (74.2%)              |
| Female                                       | 204 (27.3%)            | 293 (25.8%)              |
| Race                                         |                        |                          |
| White/Other                                  | 327 (43.7%)            | 587 (51.7%)              |
| Asian                                        | 59 (7.9%)              | 83 (7.3%)                |
| Black                                        | 257 (34.4%)            | 305 (26.8%)              |
| Hispanic                                     | 105 (14.0%)            | 161 (14.2%)              |
| Geographic Location                          |                        |                          |
| United States                                | 65 (8.7%)              | 119 (10.5%)              |
| Africa                                       | 202 (27.0%)            | 217 (19.1%)              |
| Asia                                         | 51 (6.8%)              | 74 (6.5%)                |
| Europe & Israel                              | 222 (29.7%)            | 399 (35.1%)              |
| Australia                                    | 19 (2.5%)              | 32 (2.8%)                |
| Latin America                                | 189 (25.3%)            | 295 (26.0%)              |
| Treatment Regimen                            |                        |                          |
| NNRTI + 2 NRTIs                              | 612 (81.8%)            | 858 (75.5%)              |
| Protease Inhibitor + 2 NRTIs                 | 109 (14.6%)            | 228 (20.1%)              |
| Integrase Inhibitor + 2 NRTIs                | 25 (3.3%)              | 49 (4.3%)                |
| Other                                        | 2 (0.3%)               | 1 (0.1%)                 |
| Body Mass Index, kg/m <sup>2</sup>           | 24.46 (21.90, 27.91)   | 24.86 (22.28, 28.22)     |
| Hepatitis C Co-infection                     | 26 (3.6%)              | 38 (3.4%)                |
| Hepatitis B Co-infection                     | 29 (4.0%)              | 28 (2.5%)                |
| 1st CD4+, cells/mm <sup>3</sup>              | 647.0 (564.0, 792.0)   | 661.0 (578.5, 782.5)     |
| 2nd CD4+, cells/mm <sup>3</sup>              | 691.0 (591.5, 831.0)   | 615.0 (552.0, 723.0)     |
| Baseline CD8+, cells/mm <sup>3</sup>         | 1081 (800.0, 1481)     | 1013 (768.0, 1329)       |
| Baseline log <sub>10</sub> HIV RNA copies/mL | 3.95 (3.20, 4.47)      | 4.27 (3.71, 4.73)        |
| Baseline IL-6 pg/mL                          | 1.41 (0.96, 2.11)      | 1.36 (0.98, 2.15)        |
| Baseline D-dimer µg/mL                       | 0.32 (0.21, 0.51)      | 0.32 (0.23, 0.49)        |
| Years since HIV diagnosis                    | 0.96 (0.37, 3.09)      | 0.96 (0.34, 2.58)        |

Low Recovery: Initial CD4 Recovery ≤ 50 cells/mm<sup>3</sup> 8 months after initiating ART

High Recovery: Initial CD4 Recovery > 50 cells/mm<sup>3</sup> 8 months after initiating ART

Values given are median (25th, 75th percentile) for continuous variables and N (%) for categorical variables. Percentages are column percentages.

## Supplementary Table 2. Univariable and Multivariable Risk Ratios Estimated by Log Binomial and Poisson Regression for Low CD4+ Count Recovery.

| Risk Factor                                                | Univariable (Log Binomial) |         | Multivariable (Poisson Regression)* |         |
|------------------------------------------------------------|----------------------------|---------|-------------------------------------|---------|
|                                                            | RR (95% CI)                | p-value | RR (95% CI)                         | p-value |
| Age, RR per 10 years higher                                | 1.03 (0.98 - 1.09)         | 0.23    | 1.05 (0.99 - 1.12)                  | 0.11    |
| Female                                                     | 1.00 (ref.)                |         | 1.00 (ref.)                         |         |
| Male                                                       | 0.96 (0.84 - 1.08)         | 0.47    | 1.24 (1.05 - 1.45)                  | 0.009   |
| Race                                                       |                            |         |                                     |         |
| White/Other                                                | 1.00 (ref.)                |         | 1.00 (ref.)                         |         |
| Asian                                                      | 1.16 (0.94 - 1.44)         | 0.17    | 1.07 (0.53 - 2.20)                  | 0.84    |
| Black                                                      | 1.28 (1.13 - 1.45)         | <.001   | 1.05 (0.85 - 1.31)                  | 0.65    |
| Hispanic                                                   | 1.10 (0.93 - 1.31)         | 0.26    | 1.15 (0.95 - 1.40)                  | 0.16    |
| Geographic Location                                        |                            |         |                                     |         |
| United States                                              | 1.00 (ref.)                |         | 1.00 (ref.)                         |         |
| Africa                                                     | 1.36 (1.10 - 1.70)         | 0.005   | 1.24 (0.98 - 1.59)                  | 0.08    |
| Asia                                                       | 1.15 (0.87 - 1.54)         | 0.33    | 1.14 (0.53 - 2.45)                  | 0.75    |
| Europe & Israel                                            | 1.01 (0.81 - 1.26)         | 0.92    | 1.01 (0.80 - 1.28)                  | 0.94    |
| Australia                                                  | 1.05 (0.70 - 1.58)         | 0.80    | 1.06 (0.69 - 1.62)                  | 0.80    |
| Latin America                                              | 1.11 (0.88 - 1.38)         | 0.38    | 1.08 (0.85 - 1.36)                  | 0.54    |
| Treatment Regimen                                          |                            |         |                                     |         |
| NNRTI + 2 NRTIs                                            | 1.00 (ref.)                |         | 1.00 (ref.)                         |         |
| Protease Inhibitor + 2 NRTIs                               | 0.78 (0.66 - 0.92)         | 0.003   | 0.86 (0.73 - 1.03)                  | 0.10    |
| Integrase Inhibitor + 2 NRTIs                              | 0.81 (0.59 - 1.12)         | 0.21    | 0.94 (0.68 - 1.31)                  | 0.73    |
| Other                                                      | 1.60 (0.72 - 3.57)         | 0.25    | 1.29 (0.39 - 4.28)                  | 0.68    |
| Body Mass Index, RR per kg/m <sup>2</sup> higher           | 1.00 (0.99 - 1.01)         | 0.53    | 0.99 (0.98 - 1.00)                  | 0.09    |
| Hepatitis C Co-infection                                   | 1.03 (0.76 - 1.40)         | 0.83    | 0.99 (0.73 - 1.33)                  | 0.94    |
| Hepatitis B Co-infection                                   | 1.30 (1.00 - 1.68)         | 0.05    | 1.18 (0.90 - 1.55)                  | 0.24    |
| Screening CD4+, RR per 100 fewer cells/mm <sup>3</sup>     | 1.00 (0.97 - 1.03)         | 0.84    | 1.05 (1.01 - 1.08)                  | 0.004   |
| Baseline CD8+, RR per 100 more cells/mm <sup>3</sup>       | 1.02 (1.01 - 1.03)         | <.001   | 1.03 (1.02 - 1.04)                  | <.001   |
| Baseline HIV RNA copies/mL, RR per log <sub>10</sub> lower | 1.32 (1.26 - 1.38)         | <.001   | 1.40 (1.31 - 1.50)                  | <.001   |
| Baseline IL-6 pg/mL, RR per log <sub>2</sub> higher        | 1.00 (0.95 - 1.07)         | 0.89    | 1.04 (0.97 - 1.10)                  | 0.28    |
| Baseline log <sub>2</sub> D-dimer µg/mL                    | 1.09 (1.02 - 1.17)         | 0.008   | 1.11 (1.01 - 1.21)                  | 0.034   |
| Baseline (log <sub>2</sub> D-dimer µg/mL) <sup>2</sup>     | 1.04 (1.01 - 1.06)         | 0.007   | 1.05 (1.02 - 1.08)                  | 0.004   |
| Time since HIV diagnosis, RR per 1 year higher             | 1.02 (1.01 - 1.04)         | 0.004   | 1.01 (1.00 - 1.03)                  | 0.13    |

\*Due to convergence issues with the log-binomial model, the model was fit using Poisson regression with robust standard errors

Low Recovery: Initial CD4 Recovery ≤ 50 cells/mm<sup>3</sup> 8 months after initiating ART

High Recovery: Initial CD4 Recovery > 50 cells/mm<sup>3</sup> 8 months after initiating ART

RR: Relative Risk; 95% CI: 95% confidence interval.

Supplementary Figure 1. Percent of participants with low CD4+ recovery after 8 months by tertiles of baseline CD8+ and baseline RNA copies/mL. Samples sizes are indicated for each subgroup.

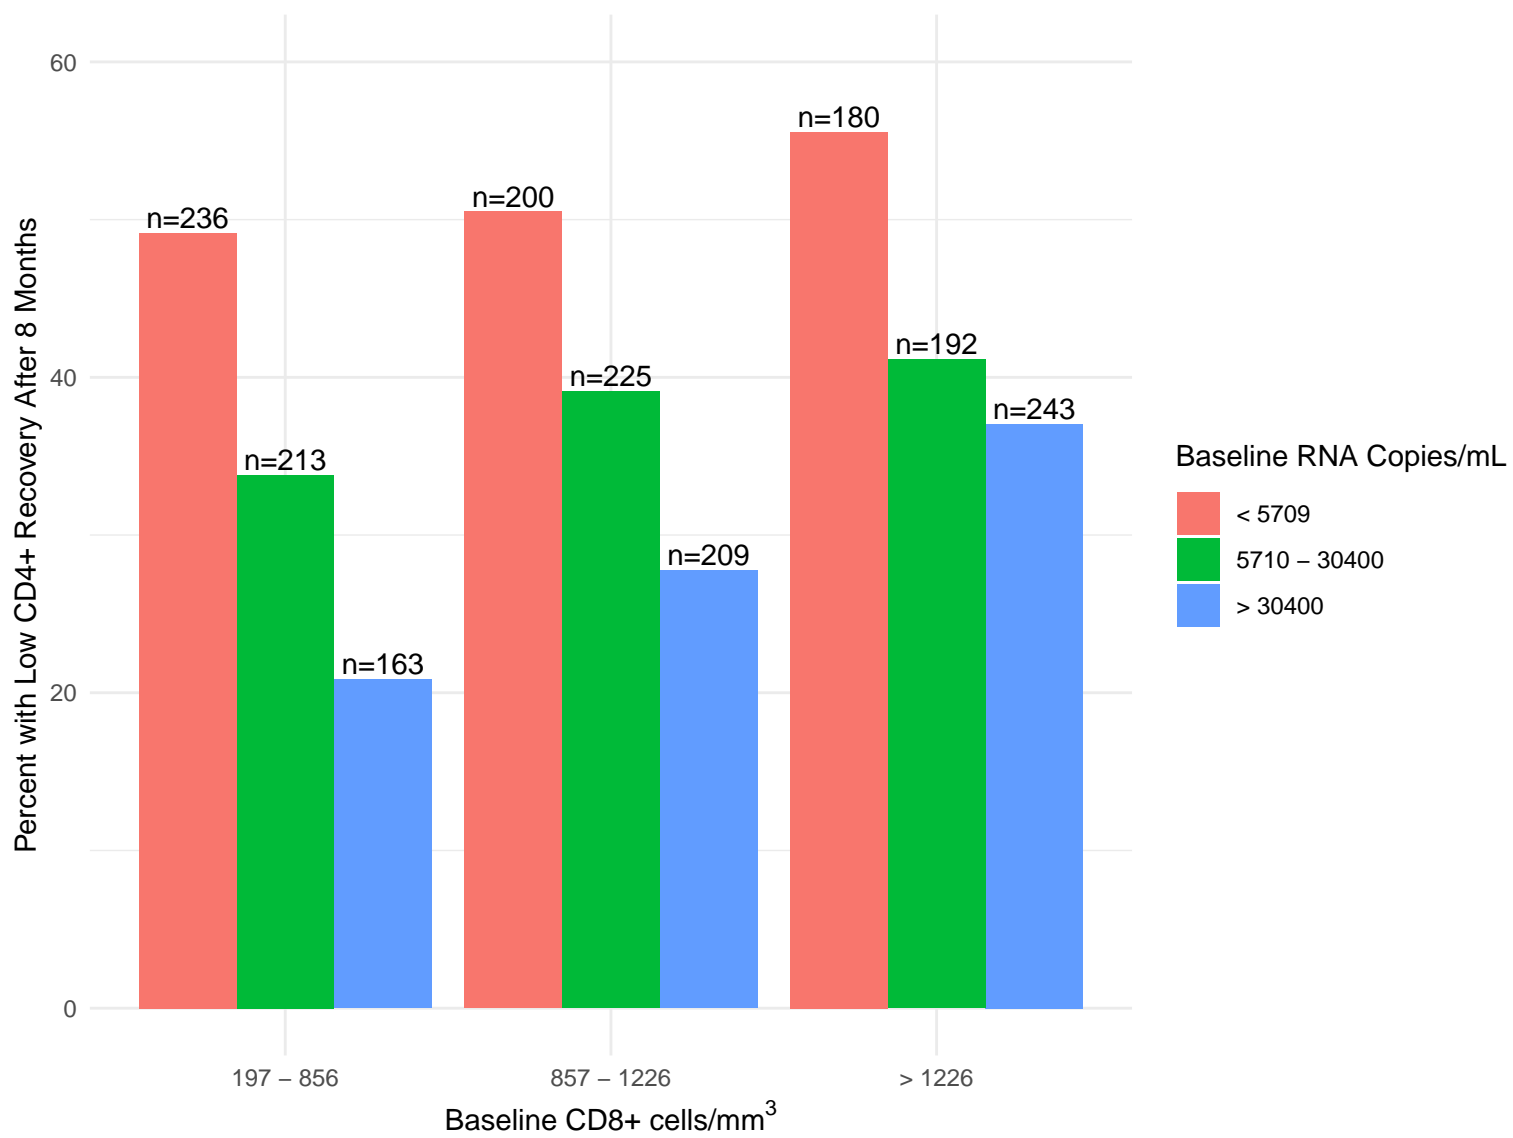

Supplement: NIHMS1517971-supplement-Supplemental_Digital_Content.pdf [file NIHMS1517971-supplement-Supplemental_Digital_Content.pdf]
